# Supplementary material for: Conjugative Plasmid pPPUT-Tik1-1 from a Permafrost<em> Pseuomonas putida</em> Strain and Its Present-Day Counterparts Inhabiting Environments and Clinic
Source: Preprints.org preprint supplement (doi:10.20944/preprints202307.0767.v1), 2023-07-12
Supplement: Supplementary file 4 [file Table S2.doc]

**Table S2. Identification of the replicon type of pPPUT-Tik1-1**

| **Inc group** | **Reference Plasmid** | **AC** | ***repA1*** | | ***repA2*** | |
| --- | --- | --- | --- | --- | --- | --- |
| **Identity** | **cover** | **Identity** | **Cover** |
| IncP-1 | R751 | AP002527.1 | absent | - | absent | - |
| IncP-2 | Rms139* | LC653116.1 | 37.2% | 46. 7% | absent | - |
| pOZ176* | NC_022344.1 | 38.7% | 12% | 31.6% | 49% |
| IncP-3 | pRA1 | FJ705807.1 | absent | - | 85.3% | 3% |
| IncP-3-like | pNK546a | MN433457.1 | 39% | 12% | 39% | 11% |
| pQBR103 | NC_009444.1 | 52% | 5% | absent | - |
| IncP-4 (Q) | RSF1010 | NC_001740.1 | absent | - | absent | - |
| IncP-6 | Rms149 | AJ877225.1 | 88% | 2% | 32% | 11% |
| p10265-KPC | KU578314.1 | 36% | 27% | absent | - |
| IncU | pD5170990 | KX169264.1 | 37% | 20% | 41% | 35% |
| IncP-7 | pND6-1 | AY208917.1 | 41% | 6% | 45% | 24% |
| pCAR1 | NC_004444.1 | 75,0% | 11% | 35% | 51% |
| IncP-9 | pWWO | AJ344068.1 | 48% | 6% | absent | - |
| pDTG1 | NC_004999.1 | 41% | 6% | 42% | 8% |
| IncP-10 | R91-5 | X54695.1 | absent | - | absent | - |
| IncP-11** | pOXA-198 | MG958650.1 | **72%** | **88%** | 37% | 10% |
| pRSB101 | AJ698325.1 | **72%** | **92%** | absent | - |
| pPAO33 | CP089239.1 | **72%** | **96%** | 43% | 17% |
| pPT23A | pPS0081 | KY362368.1 | **66.7%** | **84%** | 50% | 32% |
| pPS7B44 | KY362373.1 | **66.7%** | **90%** | 38.9% | 40% |
| IncpSTY-1 | pSTY | NC_022739.1 | 48% | 6% | 40% | 12% |
| IncpSTY-2 | p716811-VIM | MN310372.1 | absent | - | 30.4% | 14% |
| IncpSTY-3 | pHN39-SIM | KU254577.1 | 34.8 | 16% | 55.6 | 5% |

*plasmid Rms139 contains a single *rep* gene (repP-2A), while plasmid pOZ176 contains two *rep* genes; **proposed by Bonnin et al. [9].
