# Supplementary material for: Conjugative Plasmid pPPUT-Tik1-1 from a Permafrost<em> Pseuomonas putida</em> Strain and Its Present-Day Counterparts Inhabiting Environments and Clinic
Source: Preprints.org preprint supplement (doi:10.20944/preprints202307.0767.v1), 2023-07-12
Supplement: Supplementary file 5 [file Table S3.doc]

**Table S3. List of pPPUT-Tik1-1 homologs found in whole shortgun contigs sequences**

| **Accession number** | **Species** | **Strain** | **Contig** | **Size** | **Source** | **Accessory modules** |
| --- | --- | --- | --- | --- | --- | --- |
| [CAIGJX010000016.1](https://www.ncbi.nlm.nih.gov/nucleotide/CAIGJX010000016.1?report=genbank&log$=nucltop&blast_rank=1&RID=8A2T7JWR01N) [CAIGJX010000128.1](https://www.ncbi.nlm.nih.gov/nucleotide/CAIGJX010000016.1?report=genbank&log$=nucltop&blast_rank=1&RID=8A2T7JWR01N) | *P. putida* | Isolate 8 | NODE16 NODE128 | 89894 10532 | *n*d | solvent (toluene) tolerance |
| [LSUZ01000124.1](https://www.ncbi.nlm.nih.gov/nuccore/LSUZ01000124) | *P. putida* | INSali382 PpAli382 | 21 | 87257 | vegetable |  |
| JAJSQY010000040.1 JAJSQY010000041.1 | ***P. putida*** | NMI5241_13 | NODE40 NODE41 | 57001 53270 | Homo sapience |  |
| JADUCG010000055.1 JADUCG010000036.1 | *P. putida* | PSB00025 | c0055 c0036 | 39438 59934 | Homo sapience | Tn*5563a* |
| [LVHH01000062.1](https://www.ncbi.nlm.nih.gov/nuccore/LVHH01000062) [LVHH01000087.1](https://www.ncbi.nlm.nih.gov/nuccore/LVHH01000062) | *P. putida* | [KB9](https://blast.ncbi.nlm.nih.gov/Blast.cgi" \l "alnHdr_1028790292) | scaffold57 scaffold8.1 | 32054 304965 | apoplast from Arabidopsis thaliana | Tn*5563a* |
| JAEHTH010000069.1 JAEHTH010000022.1 | ***P. putida*** | **PSB00039** | c0069 c0022 | 22362 87727 | Homo sapience | ΔTn*501** Tn*5563a* |
| JAEHTG010000065.1 JAEHTG010000035.1 | *P. putida* | PSB00040 | c0065 c0035 | 22286 65334 | Homo sapience | ΔTn*501** |
| JADUCP010000013.1 | *P. putida* | PSB00012 | c0013 | 146218 | Homo sapience | ΔTn*501** Tn*5563a chrAB* |
| RJAI01000012.1 RJAI01000007.1 RJAI01000117.1 | *P. putida* | 12917 | contig_12 contig_7 contig_11 | 52850 21999 11087 | Homo sapience | Tn*5041* |
| 22[JAJSQT010000015.1](https://www.ncbi.nlm.nih.gov/nucleotide/JAJSQT010000015.1?report=genbank&log$=nucltop&blast_rank=5&RID=8A2T7JWR01N) | *P. alloputida* | NMI6396_12 | NODE_15 | 145154 | Homo sapience | **-** |
| [JAJSRL010000007.1](https://www.ncbi.nlm.nih.gov/nucleotide/JAJSQT010000015.1?report=genbank&log$=nucltop&blast_rank=5&RID=8A2T7JWR01N) | *P. alloputida* | NMI3760_14 | NODE_7 | 135534 | Homo sapience | Tn*5563a* |
| JAJSRH010000059.1 JAJSRH010000025.1 | *P. alloputida* | NMI733_14 | NODE_59 NODE_25 | 22202 98021 | Homo sapience | Tn*5563a* |
| [JAJSQJ010000044.1](https://www.ncbi.nlm.nih.gov/nucleotide/JAJSQT010000015.1?report=genbank&log$=nucltop&blast_rank=5&RID=8A2T7JWR01N) JAJSQJ010000033.1 | *P. monteileii* | NMI5622_11 | NODE_44 NODE_33 | 38379 59857 | Homo sapience | Tn*512-*like Tn*5563a* |
| JAEHTA010000047.1 JAEHTA010000050.1 | *P. monteileii* | PSB00047 | -c0047 -c0050 | 51891 44578 | Homo sapience | ΔTn*512* Tn*5563a* |
| JALLLY010000012.1 JALLLY010000110.1 | *P. juntendi* | CCBH26530 12 | **-**  **-** | 85016 13939 | Homo sapience | Tn*512-*like Tn*5563a* |
| JAKGAU010000017.1 JAKGAU010000052.1 | *P. juntendi* | AR 06 | NODE_17 NODE_52 | 92387 33691 | Water | *ant(2’’)-Ic, aac(6’)-I1,* ΔTn*501*, VIM- 2* |
| JALLLV010000025.1 JALLLV010000069.1 | *P. juntendi* | CCBH28261 25  CCBH28261 69 | -  - | 84744 18370 | Homo sapience | ΔTn*501** |
| BQIS01000035.1 BQIS01000046.1 | *P. juntendi* | BML-PP051 | seq 035 seq 046 | 58033 41590 | Homo sapience | ΔTn*501** Tn*5563a* |
| JPFC01000002.1 | *P. aeruginosa* | T36994 | contig 2 | 147637 | Homo sapience | Tn*5563a chrAB;* czc |
| [CAADPP010000006.1](https://www.ncbi.nlm.nih.gov/nucleotide/CAADPP010000006.1?report=genbank&log$=nucltop&blast_rank=31&RID=KE1YECDD016) [CAADPP010000335.1](https://www.ncbi.nlm.nih.gov/nucleotide/CAADPP010000006.1?report=genbank&log$=nucltop&blast_rank=31&RID=KE1YECDD016) [CAADPP010000307.1](https://www.ncbi.nlm.nih.gov/nucleotide/CAADPP010000006.1?report=genbank&log$=nucltop&blast_rank=31&RID=KE1YECDD016) | *P. aeruginosa* | DR-PA | NODE_8 NODE_397  NODE_366 | 27897 43323 12221 | nd | nd |
| [NSZE01000024.1](https://www.ncbi.nlm.nih.gov/nuccore/NSZE01000024) [NSZE01000027.1](https://www.ncbi.nlm.nih.gov/nuccore/NSZE01000024) | *P. aeruginosa* | AUS502 | IPC239_24.1 IPC239_271 | 75966 51418 | river, Australia | Tn*5393* ΔTn*501*-like |
| [DAHOBZ010000041.1](https://www.ncbi.nlm.nih.gov/nucleotide/DAHOBZ010000041.1?report=genbank&log$=nucltop&blast_rank=7&RID=KH3U774Y013) [DAHOBZ010000119.1](https://www.ncbi.nlm.nih.gov/nucleotide/DAHOBZ010000041.1?report=genbank&log$=nucltop&blast_rank=7&RID=KH3U774Y013) | *P. aeruginosa* | ARLG-10079 | denovo.042  denovo.127 | 61557 6577 | Homo sapience; Urine | Tn*5046* |
| QFNP01000030.1 QFNP01000051.1 | *P. protegens* | 52_018_000_R2 | scaffold_370 scaffold_2650 | 74053 18400 | hospital surfaces and sink samples | - |
| AXUP01000462.1 | *P. taiwanensis* | SJ9 | contig 463 | 178072 | industrial wastewater | Tn*5046* ,Cu-r, czc, Tn*5563a* |
| [WIVU01000058.1](https://www.ncbi.nlm.nih.gov/nuccore/WIVU01000058) [WIVU01000040.1](https://www.ncbi.nlm.nih.gov/nuccore/WIVU01000058) | *P. helleri* | FSL R10-1637 | NODE_58 NODE_40 | 39966 49747 | pasteurized milk | - |
| [JAEHTC010000076.1](https://www.ncbi.nlm.nih.gov/nucleotide/JAEHTC010000076.1?report=genbank&log$=nucltop&blast_rank=13&RID=KE1YECDD016)b [JAEHTC010000031.1](https://www.ncbi.nlm.nih.gov/nucleotide/JAEHTC010000076.1?report=genbank&log$=nucltop&blast_rank=13&RID=KE1YECDD016) | *P. koreensis* | PSB00045 | c0076 c0031 | 30856 64709 | Homo sapience, sputum | Tn*5563a* ΔTn*501* |
| [POGD01000006.1](https://www.ncbi.nlm.nih.gov/nuccore/POGD01000006) | *Pseudomonas sp* | MPR-R5B | NODE_6 | 117112 | Groundwater | two mer-operons |
| [JANFEZ010000008.1](https://www.ncbi.nlm.nih.gov/nucleotide/JANFEZ010000008.1?report=genbank&log$=nucltop&blast_rank=17&RID=KE1YECDD016) | *Pseudomonas sp* | Eb3 | NODE_8 | 110480 | Mangrove | **ΔTn*501*** |
| [BCBA01000063.1](https://www.ncbi.nlm.nih.gov/nuccore/BCBA01000063) | *Pseudomonas sp* | NBRC 111124 | PPU10_CON00065 | 100622 | culture collection | partial mer-operon |
| JAJSRO010000019.1 | *Pseudomonas sp* | NMI542 | 15 NODE | 129844 | Homo sapience, rectal swab | Tn*512*-like 2 copies *VIM-2* |
| RHQS01000004.1 | *Pseudomonas sp* | P99 | contig 4 | 108977 | nursing call button | Tn*5563a* |
| AEWE02000020.1 | *Pseudomonas sp* | TJI-51 | contig 20 | 104101 | nursing call button | ΔTn*501** |
| QJRK01000012.1 ++QJRK01000062.1 | *Pseudomonas sp* | MB-090624 | NODE_12NODE_62 | 119699 34971 | Lake Michigan | ΔTn*501**, Tn*5563a, chrAB* |
| JACNDO010000013.1 | *Pseudomonas sp* | FW301-21D1A | contig 13 | 116955 | Groundwater | Tn*501-*like |
