# Supplementary figures and images for: Conjugative Plasmid pPPUT-Tik1-1 from a Permafrost<em> Pseuomonas putida</em> Strain and Its Present-Day Counterparts Inhabiting Environments and Clinic
Source: Preprints.org preprint supplement (doi:10.20944/preprints202307.0767.v1), 2023-07-12

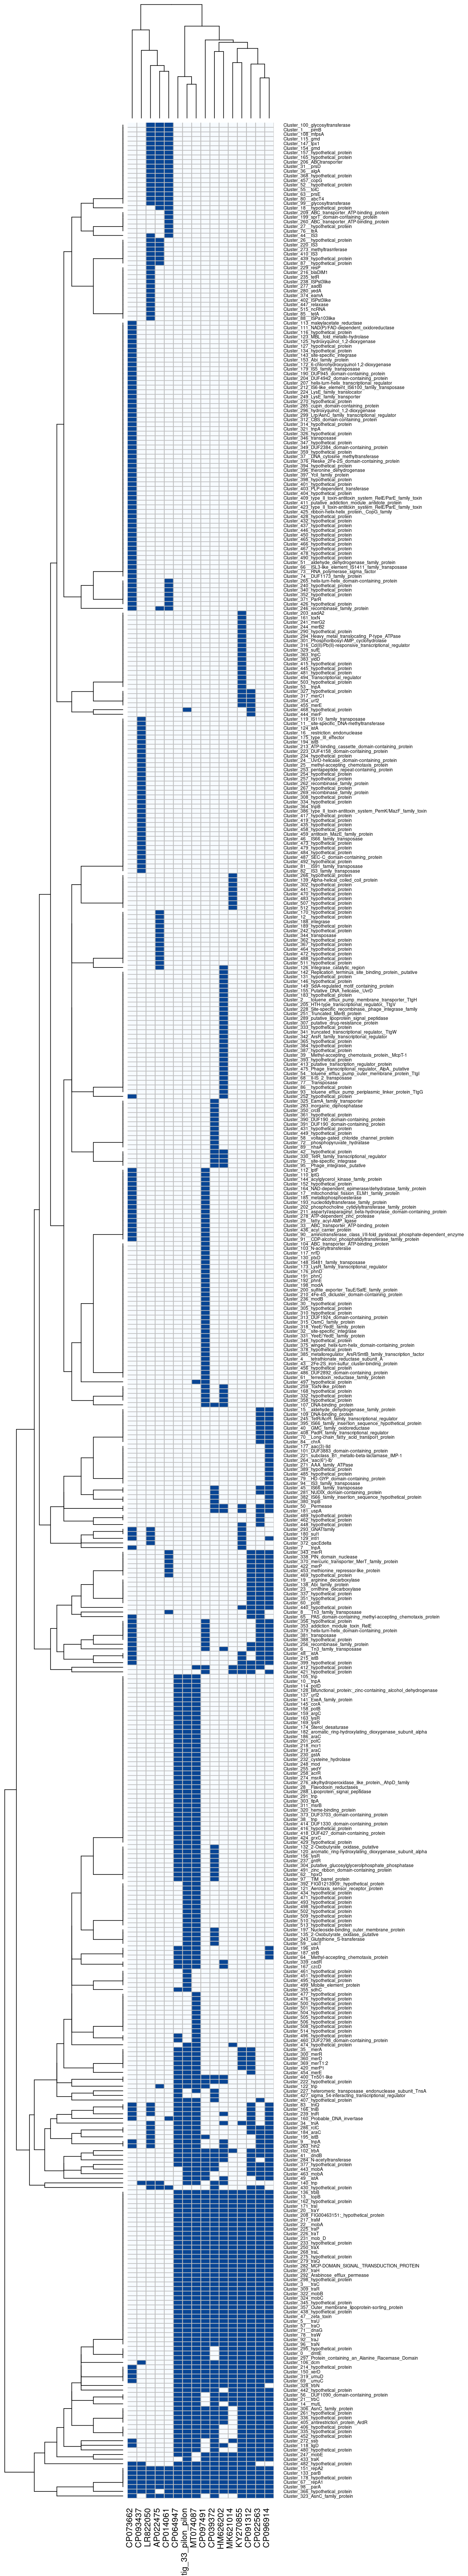


Figure 1S Whole genome analysis of the plasmids, related to pPPUT-Tik1-1

Supplement: Supplementary file 1 [file Figure 1S.doc]

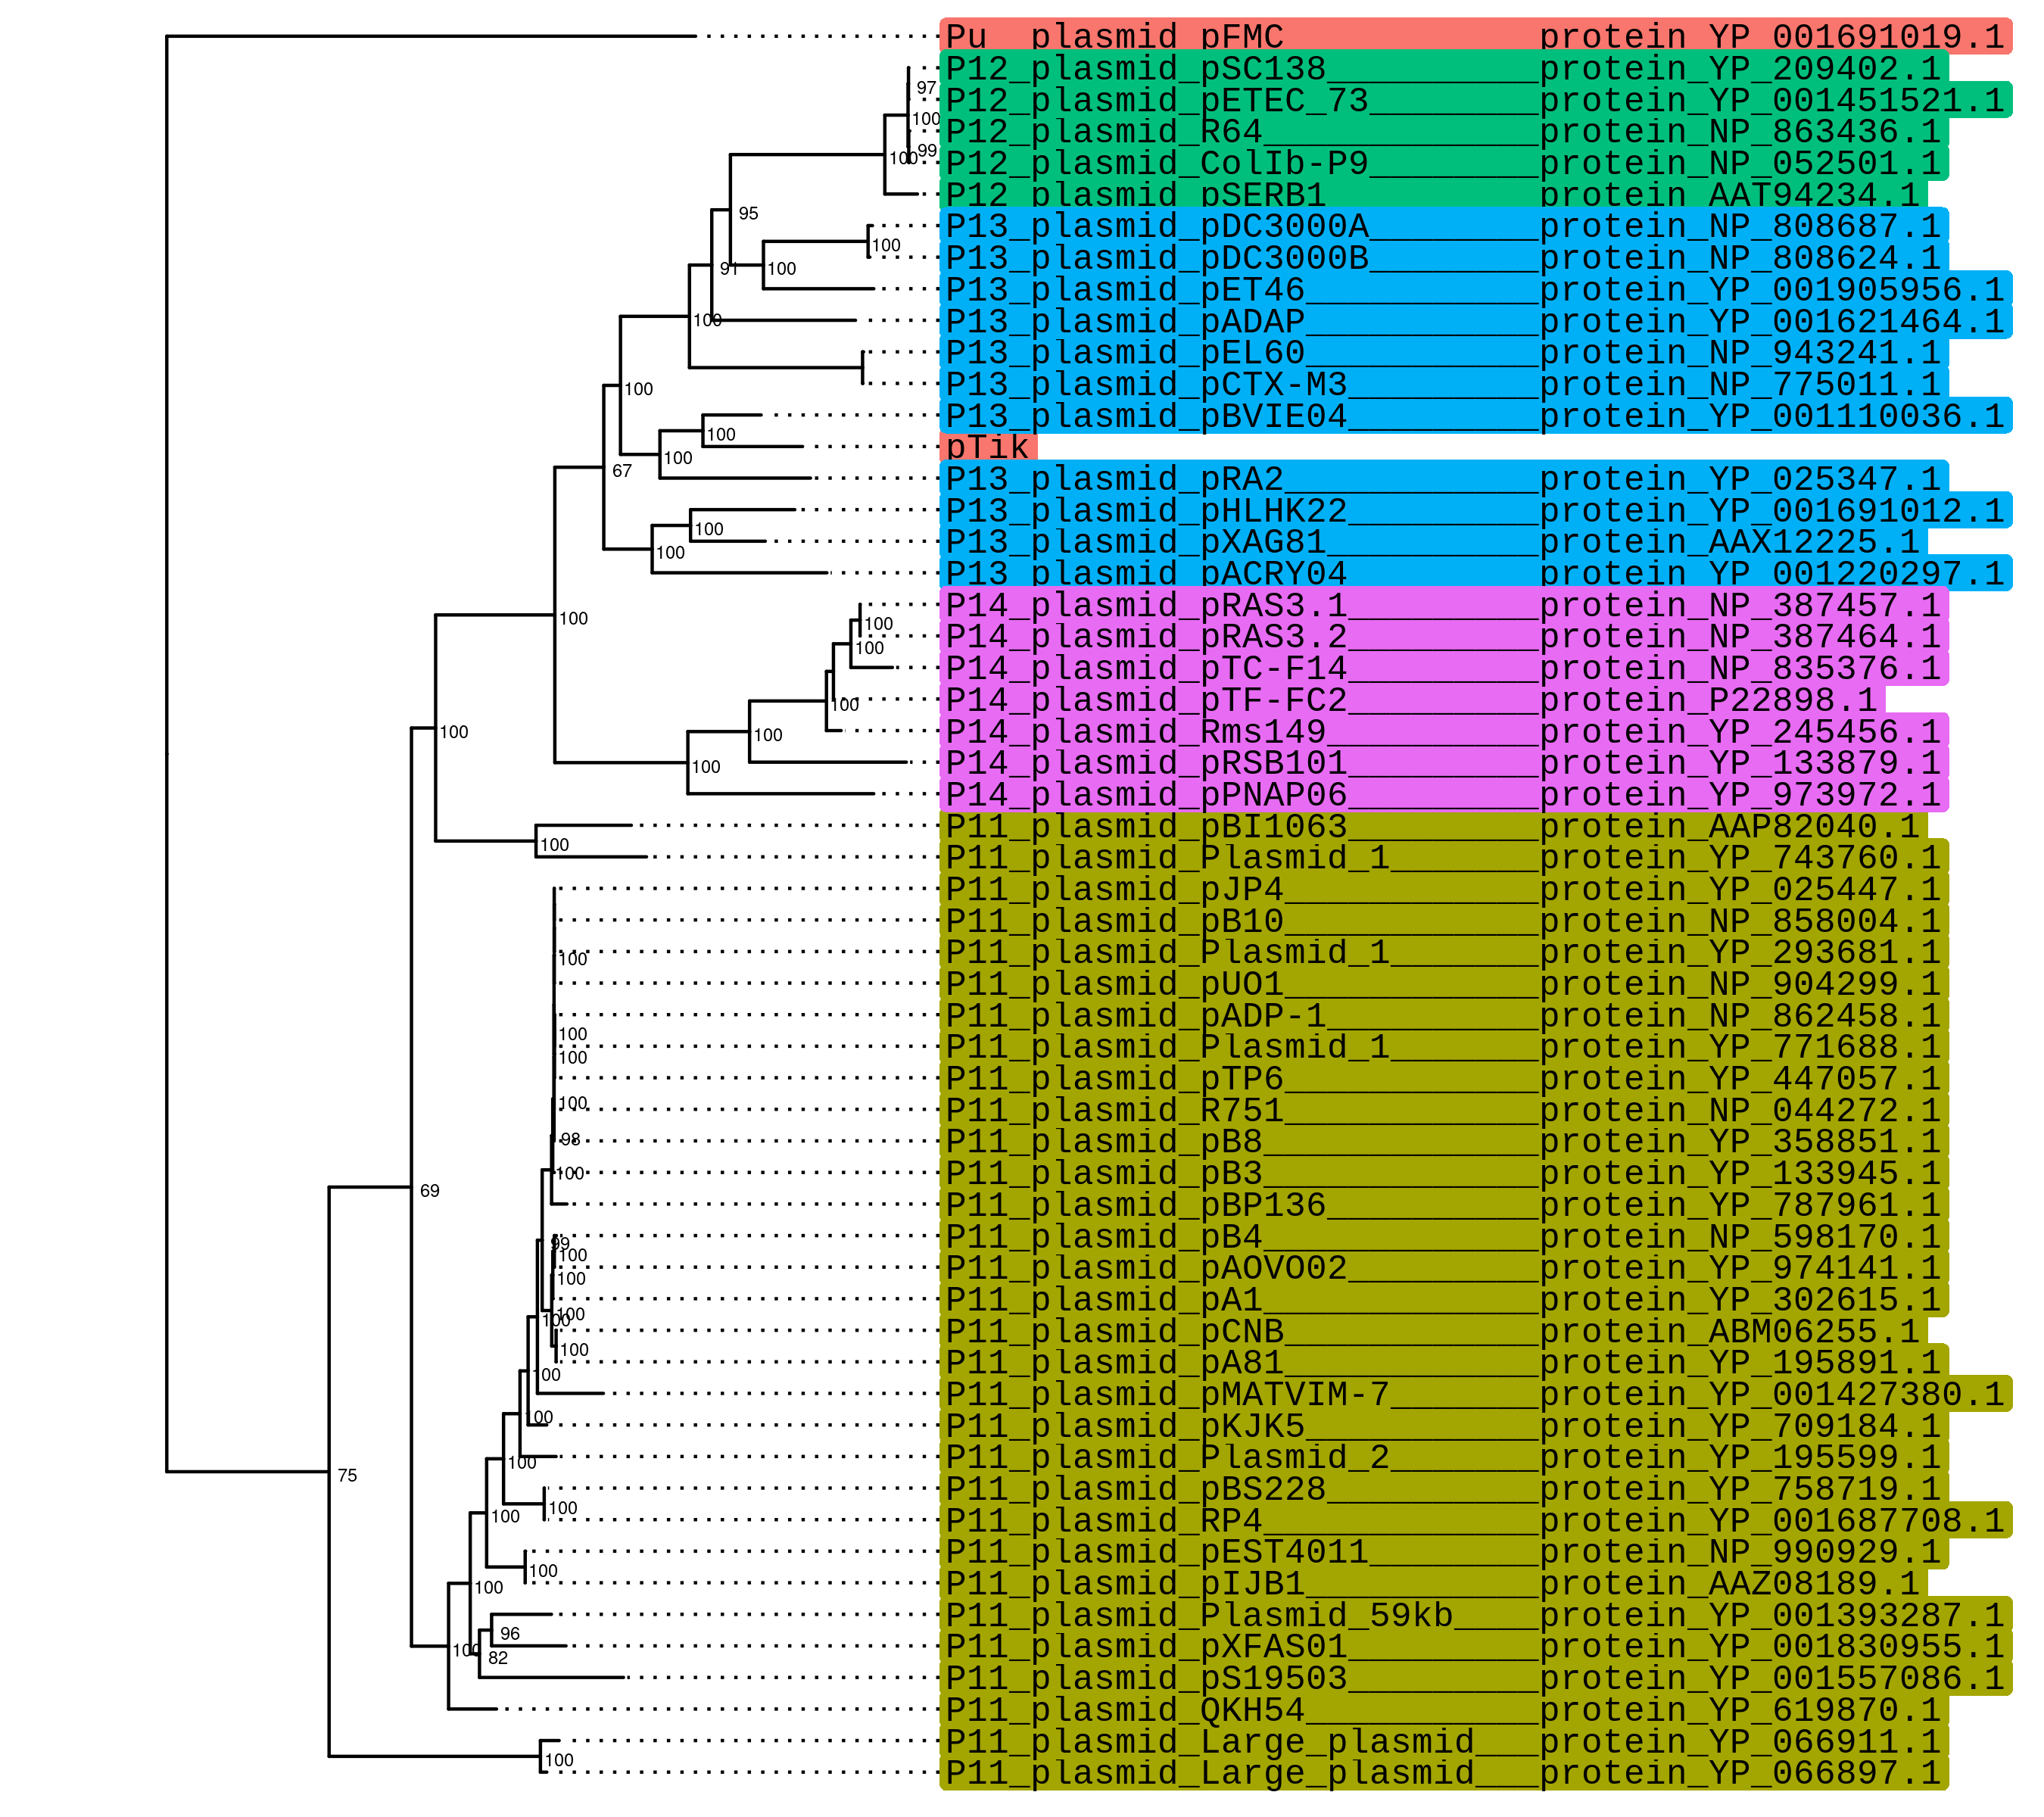


**Figure S2. Phylogenetic tree of the *mob* genes from clades P11, P12, P13, P14.**

Supplement: Supplementary file 2 [file Figure S2.doc]
